# Supplementary material
Source: PubMed Central journal article supplement (PMC4249029)
Supplement: AEM.01774-14_zam999105763so1.pdf [file AEM.01774-14_zam999105763so1.pdf]

Figure S1

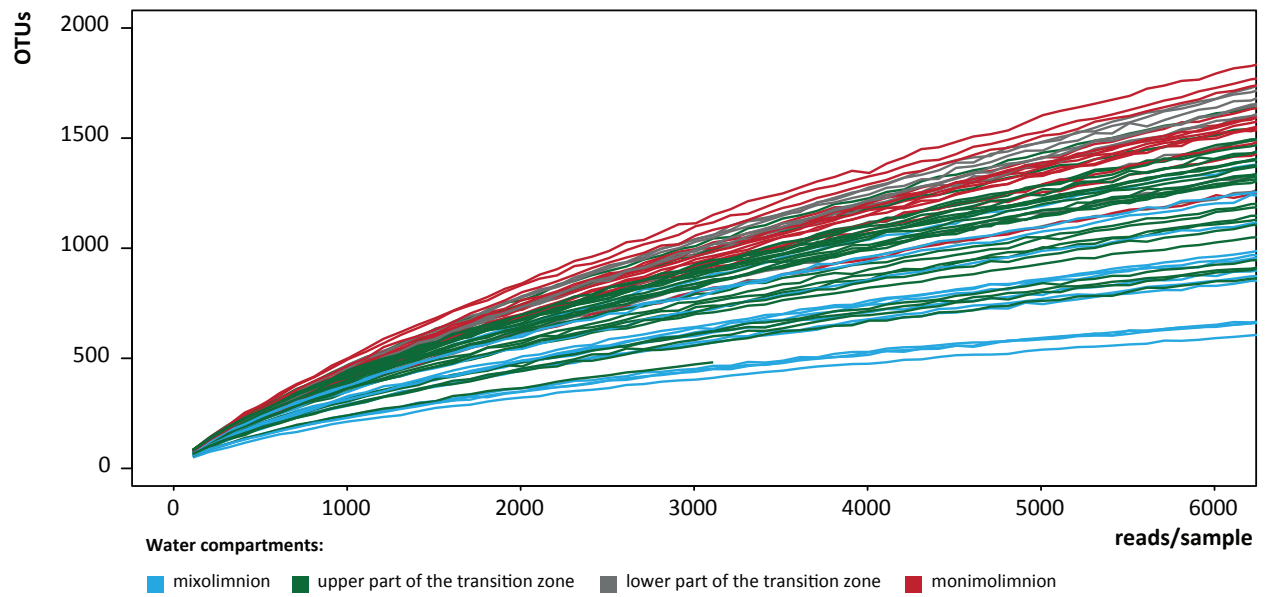

**Figure S1:** Richness estimates based on count data from the global Sakinaw Lake dataset, which contained a total of 66 amples collected between June 2007 and May 2011, indicated that the mixolimnion had fewer OTUs than samples from the transition zone and monimolimnion.

Figure S2

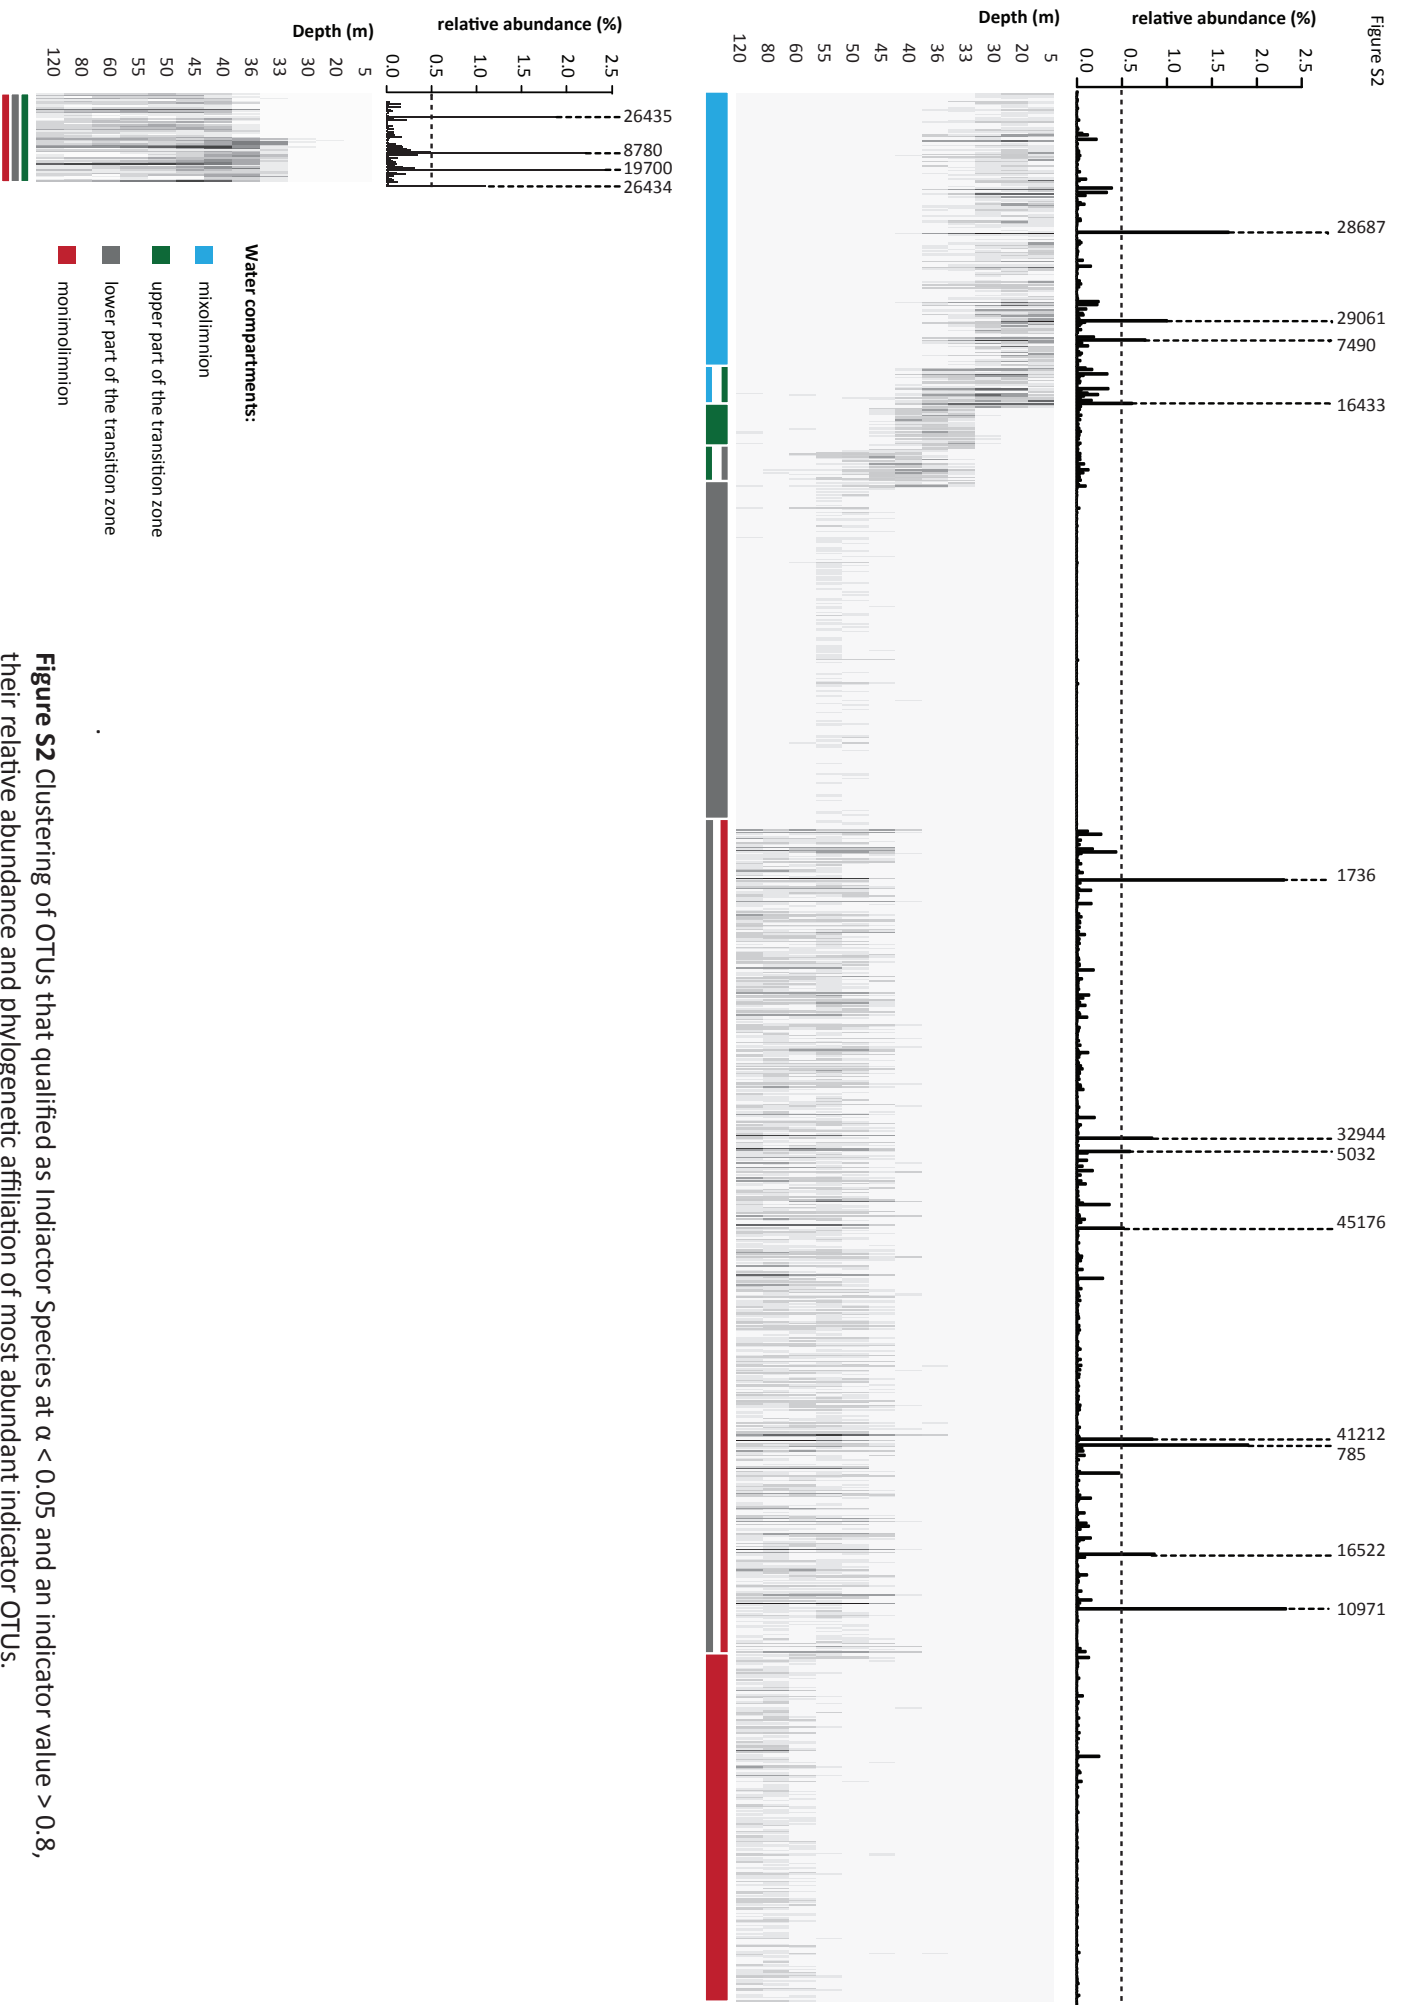

**Figure S2** Clustering of OTUs that qualified as Indicator Species at  $\alpha < 0.05$  and an indicator value  $> 0.8$ , their relative abundance and phylogenetic affiliation of most abundant indicator OTUs.



**Table S1 Global Sakinaw Lake dataset**

| Compartment                  | Depth | June 6<br>2007 | October 23<br>2007 | May 21<br>2008 | August 5<br>2009 | January 5<br>2010 | January 27<br>2011 | May 24<br>2011 |
|------------------------------|-------|----------------|--------------------|----------------|------------------|-------------------|--------------------|----------------|
| epilimnion                   | 5 m   |                |                    |                |                  |                   | X                  | X              |
|                              | 10 m  |                | X                  |                | X                |                   |                    |                |
|                              | 20 m  |                |                    |                |                  |                   |                    | X              |
|                              | 25 m  | X              |                    |                | X                |                   |                    |                |
|                              | 30 m  | X              | X                  |                | X                | X                 | X                  | X              |
| upper part of the chemocline | 31 m  |                |                    | X              |                  |                   |                    |                |
|                              | 32 m  |                |                    | X              |                  |                   |                    |                |
|                              | 33 m  | X              | X                  | X              | X                | X                 | X                  | X              |
|                              | 34 m  |                |                    | X              |                  |                   |                    |                |
|                              | 35 m  |                |                    | X              |                  |                   |                    |                |
|                              | 36 m  |                | X                  | X              | X                | X                 | X                  | X              |
|                              | 37 m  |                |                    | X              | X                |                   |                    |                |
|                              | 38 m  |                |                    | X              |                  |                   |                    |                |
|                              | 39 m  |                |                    | X              |                  |                   |                    |                |
|                              | 40 m  | X              | X                  |                | X                | X                 | X                  | X              |
| 45 m                         |       | X              |                    | X              | X                | X                 | X                  |                |
| lower part<br>chemocline     | 50 m  |                |                    |                | X                | X                 | X                  | X              |
|                              | 55 m  | X              | X                  |                | X                | X                 | X                  | X              |
| monimolimnion                | 60 m  |                | X                  |                | X                |                   |                    | X              |
|                              | 80 m  |                | X                  |                | X                | X                 | X                  | X              |
|                              | 120 m | X              | X                  |                | X                | X                 | X                  | X              |

|                               | June 6<br>2007 | October 23<br>2007 | May 21<br>2008 | August 5<br>2009 | January 5<br>2010 | January 27<br>2011 | May 24<br>2011 | Total   |
|-------------------------------|----------------|--------------------|----------------|------------------|-------------------|--------------------|----------------|---------|
| <b>Reads</b>                  | 84 931         | 10 4953            | 79 498         | 205 121          | 111 795           | 133 902            | 181 464        | 901 664 |
| <b>non-singleton<br/>OTUs</b> | 9 141          | 9 920              | 5 973          | 12 409           | 9 182             | 11 922             | 12 908         | 23 230  |

**Table S4: Common baseline conditions of environmental parameter in geographically distinct meromictic lakes.**

| Lake         | Lake type   | Geographical location                    | Depth of chemocline (total depth) | max H <sub>2</sub> S | max. SO <sub>4</sub> <sup>2-</sup> $\mu$ M/L (depth) | max soluble Fe ( $\mu$ M) (depth) | max soluble Mn ( $\mu$ M) (depth) | max CH <sub>4</sub> ( $\mu$ M) (depth) | max cell counts                          | Reference                                                                                                                              |
|--------------|-------------|------------------------------------------|-----------------------------------|----------------------|------------------------------------------------------|-----------------------------------|-----------------------------------|----------------------------------------|------------------------------------------|----------------------------------------------------------------------------------------------------------------------------------------|
| Sakinaw Lake | ex-fjord    | Sunshine Coast British Columbia, Canada  | 33 m (140 m)                      | 4500 (120 m)         | 81.81 (36 m)                                         | 4.02 (36 m)                       | 5.75 (36 m)                       | 3000 (below 40 m)                      | $2.8 \cdot 10^5$ cells mL <sup>-1</sup>  | Vagle, S., et al., <i>Limnology and Oceanography</i> , 2010, 55(3): p. 1313-1326.                                                      |
| Lake Cadagno | alpine lake | Canton of Ticino, Switzerland            | 12 m (20 m)                       | 205 (18 m)           | 1560 (16 m)                                          | 1.6 (20 m)                        | NA                                | 44 (7.6 cm above sediment)             | $10^7$ cells mL <sup>-1</sup>            | Peduzzi, S., M. Tonolla, and D. Hahn, <i>Aquatic Microbial Ecology</i> , 2003, 30(3): p. 295-302.                                      |
| Lake Pavin   | crater lake | Auvergne, Central France                 | 60 m (90 m)                       | 3.7 $\mu$ M (85 m)   | 16.9 (60 m)                                          | 1211 (90 m)                       | 25.7 (85 m)                       | 6200 (90 m)                            | $1.2 \cdot 10^7$ cells mL <sup>-1</sup>  | Wagner, S., S. Schulz, and K. Hanselmann, <i>Fems Microbiology Ecology</i> , 1990, 74(1): p. 39-48.                                    |
| Lake Mahoney | saline lake | Okanagan Valley British Columbia, Canada | 5 m (15 m)                        | 30000–35000 (15 m)   | 400000–500000 (15 m)                                 | NA                                | NA                                | NA                                     | $10^8$ cells mL <sup>-1</sup>            | Lehours, A. C., C. Bardot, et al. (2005). <i>Appl Environ Microbiol</i> 71(11): 7389-7400.                                             |
| Lake A       | ex-fjord    | High Arctic, Canada                      | 13 m (60 m)                       | NA                   | NA                                                   | 35.8 (30 m)                       | 176.5 (10-29 m)                   | NA                                     | $2.52 \cdot 10^7$ cells mL <sup>-1</sup> | Bura-Nakic, E., E. Viollier, et al. (2009). <i>Chemical Geology</i> 266(3-4): 311-317.                                                 |
|              |             |                                          |                                   |                      |                                                      |                                   |                                   |                                        |                                          | Klepac-Ceraj, V., et al., <i>Microbial diversity under extreme euxinia: Mahoney Lake, Canada. Geobiology</i> , 2012, 10(3): p. 223-35. |
|              |             |                                          |                                   |                      |                                                      |                                   |                                   |                                        |                                          | Van Hove, P., et al., <i>Canadian Journal of Earth Sciences</i> , 2006, 43(5): p. 533-546.                                             |
